# Supplementary material for: Seasonal Succession of Free-Living Bacterial Communities in Coastal Waters of the Western Antarctic Peninsula
Source: Front Microbiol. 2016 Nov 3;7:1731. doi: 10.3389/fmicb.2016.01731 (PMC5093341; doi:10.3389/fmicb.2016.01731)
Supplement: Supplementary file 1 [file Table_2.xlsx]

## Sheet: Sheet1
Supplementary Table S2. MIMARKS-compliant metadata.
Group	Variable Name	Units	LAZPALBv6.PAL01220130704F02	LAZPALBv6.PAL01320130704F02	LAZPALBv6.PAL05420130824F02	LAZPALBv6.PAL07220130907F02	LAZPALBv6.PAL07320130907F02	LAZPALBv6.PAL07420130907F02	LAZPALBv6.PAL08120130919F02	LAZPALBv6.PAL08220130919F02	LAZPALBv6.PAL08320130919F02	LAZPALBv6.PAL12320131021F02	LAZPALBv6.PAL12420131021F02	LAZPALBv6.PAL12520131021F02	LAZPALBv6.PAL13520131031F02	LAZPALBv6.PAL13620131031F02	LAZPALBv6.PAL13720131031F02	LAZPALBv6.PAL16020131107F02	LAZPALBv6.PAL16120131107F02	LAZPALBv6.PAL16220131107F02	LAZPALBv6.PAL18120131125F02	LAZPALBv6.PAL18220131125F02	LAZPALBv6.PAL18320131125F02	LAZPALBv6.PAL21420131204F02	LAZPALBv6.PAL21520131204F02	LAZPALBv6.PAL21620131204F02	LAZPALBv6.PAL22320131209F02	LAZPALBv6.PAL22420131209F02	LAZPALBv6.PAL22520131209F02	LAZPALBv6.PAL22620131220F02	LAZPALBv6.PAL22720131220F02	LAZPALBv6.PAL22820131220F02	LAZPALBv6.PAL22920131225F02	LAZPALBv6.PAL23020131225F02	LAZPALBv6.PAL23120131225F02	LAZPALBv6.PAL23220140101F02	LAZPALBv6.PAL23320140101F02	LAZPALBv6.PAL23420140101F02	LAZPALBv6.PAL23520140106F02	LAZPALBv6.PAL23620140106F02	LAZPALBv6.PAL23720140106F02	LAZPALBv6.PAL23820140113F02	LAZPALBv6.PAL23920140113F02	LAZPALBv6.PAL24020140113F02	LAZPALBv6.PAL24220140121F02	LAZPALBv6.PAL24320140121F02	LAZPALBv6.PAL24420140128F02	LAZPALBv6.PAL24520140128F02	LAZPALBv6.PAL24620140128F02
mimarks_investigation	experimental_factor	Alphanumeric	seasonal	seasonal	seasonal	seasonal	seasonal	seasonal	seasonal	seasonal	seasonal	seasonal	seasonal	seasonal	seasonal	seasonal	seasonal	seasonal	seasonal	seasonal	seasonal	seasonal	seasonal	seasonal	seasonal	seasonal	seasonal	seasonal	seasonal	seasonal	seasonal	seasonal	seasonal	seasonal	seasonal	seasonal	seasonal	seasonal	seasonal	seasonal	seasonal	seasonal	seasonal	seasonal	seasonal	seasonal	seasonal	seasonal	seasonal
mimarks_investigation	investigation_type	Alphanumeric	MIMARKS_Survey	MIMARKS_Survey	MIMARKS_Survey	MIMARKS_Survey	MIMARKS_Survey	MIMARKS_Survey	MIMARKS_Survey	MIMARKS_Survey	MIMARKS_Survey	MIMARKS_Survey	MIMARKS_Survey	MIMARKS_Survey	MIMARKS_Survey	MIMARKS_Survey	MIMARKS_Survey	MIMARKS_Survey	MIMARKS_Survey	MIMARKS_Survey	MIMARKS_Survey	MIMARKS_Survey	MIMARKS_Survey	MIMARKS_Survey	MIMARKS_Survey	MIMARKS_Survey	MIMARKS_Survey	MIMARKS_Survey	MIMARKS_Survey	MIMARKS_Survey	MIMARKS_Survey	MIMARKS_Survey	MIMARKS_Survey	MIMARKS_Survey	MIMARKS_Survey	MIMARKS_Survey	MIMARKS_Survey	MIMARKS_Survey	MIMARKS_Survey	MIMARKS_Survey	MIMARKS_Survey	MIMARKS_Survey	MIMARKS_Survey	MIMARKS_Survey	MIMARKS_Survey	MIMARKS_Survey	MIMARKS_Survey	MIMARKS_Survey	MIMARKS_Survey
mimarks_investigation	project_name	Alphanumeric	Palmer_sea_water_intake_sample	Palmer_sea_water_intake_sample	Palmer_sea_water_intake_sample	Palmer_sea_water_intake_sample	Palmer_sea_water_intake_sample	Palmer_sea_water_intake_sample	Palmer_sea_water_intake_sample	Palmer_sea_water_intake_sample	Palmer_sea_water_intake_sample	Palmer_sea_water_intake_sample	Palmer_sea_water_intake_sample	Palmer_sea_water_intake_sample	Palmer_sea_water_intake_sample	Palmer_sea_water_intake_sample	Palmer_sea_water_intake_sample	Palmer_sea_water_intake_sample	Palmer_sea_water_intake_sample	Palmer_sea_water_intake_sample	Palmer_sea_water_intake_sample	Palmer_sea_water_intake_sample	Palmer_sea_water_intake_sample	Palmer_sea_water_intake_sample	Palmer_sea_water_intake_sample	Palmer_sea_water_intake_sample	Palmer_sea_water_intake_sample	Palmer_sea_water_intake_sample	Palmer_sea_water_intake_sample	Palmer_sea_water_intake_sample	Palmer_sea_water_intake_sample	Palmer_sea_water_intake_sample	Palmer_sea_water_intake_sample	Palmer_sea_water_intake_sample	Palmer_sea_water_intake_sample	Palmer_sea_water_intake_sample	Palmer_sea_water_intake_sample	Palmer_sea_water_intake_sample	Palmer_sea_water_intake_sample	Palmer_sea_water_intake_sample	Palmer_sea_water_intake_sample	Palmer_sea_water_intake_sample	Palmer_sea_water_intake_sample	Palmer_sea_water_intake_sample	Palmer_sea_water_intake_sample	Palmer_sea_water_intake_sample	Palmer_sea_water_intake_sample	Palmer_sea_water_intake_sample	Palmer_sea_water_intake_sample
mimarks_investigation	sample_id	Alphanumeric	N/A	N/A	N/A	N/A	N/A	N/A	N/A	N/A	N/A	N/A	N/A	N/A	N/A	N/A	N/A	N/A	N/A	N/A	N/A	N/A	N/A	N/A	N/A	N/A	N/A	N/A	N/A	N/A	N/A	N/A	N/A	N/A	N/A	N/A	N/A	N/A	N/A	N/A	N/A	N/A	N/A	N/A	N/A	N/A	N/A	N/A	N/A
mimarks_investigation	ogl_reference_name	Alphanumeric	N/A	N/A	N/A	N/A	N/A	N/A	N/A	N/A	N/A	N/A	N/A	N/A	N/A	N/A	N/A	N/A	N/A	N/A	N/A	N/A	N/A	N/A	N/A	N/A	N/A	N/A	N/A	N/A	N/A	N/A	N/A	N/A	N/A	N/A	N/A	N/A	N/A	N/A	N/A	N/A	N/A	N/A	N/A	N/A	N/A	N/A	N/A
mimarks_investigation	submit_to_insdc	Alphanumeric	SRP091049	SRP091049	SRP091049	SRP091049	SRP091049	SRP091049	SRP091049	SRP091049	SRP091049	SRP091049	SRP091049	SRP091049	SRP091049	SRP091049	SRP091049	SRP091049	SRP091049	SRP091049	SRP091049	SRP091049	SRP091049	SRP091049	SRP091049	SRP091049	SRP091049	SRP091049	SRP091049	SRP091049	SRP091049	SRP091049	SRP091049	SRP091049	SRP091049	SRP091049	SRP091049	SRP091049	SRP091049	SRP091049	SRP091049	SRP091049	SRP091049	SRP091049	SRP091049	SRP091049	SRP091049	SRP091049	SRP091049
mimarks_environment	collection_date	UTC	2013-07-04	2013-07-04	2013-08-24	2013-09-07T08:00	2013-09-07T08:00	2013-09-07T08:00	2013-09-19T13:30	2013-09-19T13:30	2013-09-19T13:30	2013-10-21T11:00	2013-10-21T11:00	2013-10-21T11:00	2013-10-31T08:30	2013-10-31T08:30	2013-10-31T08:30	2013-11-07T10:30	2013-11-07T10:30	2013-11-07T10:30	2013-11-25T09:00	2013-11-25T09:00	2013-11-25T09:00	2013-12-04T08:30	2013-12-04T08:30	2013-12-04T08:30	2013-12-09T09:30	2013-12-09T09:30	2013-12-09T09:30	2013-12-20T09:00	2013-12-20T09:00	2013-12-20T09:00	2013-12-25T09:06	2013-12-25T09:06	2013-12-25T09:06	2014-01-01T09:15	2014-01-01T09:15	2014-01-01T09:15	2014-01-06T10:10	2014-01-06T10:10	2014-01-06T10:10	2014-01-13T11:30	2014-01-13T11:30	2014-01-13T11:30	2014-01-21T07:10	2014-01-21T07:10	2014-01-28T08:40	2014-01-28T08:40	2014-01-28T08:40
mimarks_environment	sample_type	Alphanumeric	water	water	water	water	water	water	water	water	water	water	water	water	water	water	water	water	water	water	water	water	water	water	water	water	water	water	water	water	water	water	water	water	water	water	water	water	water	water	water	water	water	water	water	water	water	water	water
mimarks_environment	country	Alphanumeric	USA	USA	USA	USA	USA	USA	USA	USA	USA	USA	USA	USA	USA	USA	USA	USA	USA	USA	USA	USA	USA	USA	USA	USA	USA	USA	USA	USA	USA	USA	USA	USA	USA	USA	USA	USA	USA	USA	USA	USA	USA	USA	USA	USA	USA	USA	USA
mimarks_environment	time	decimalTime	NULL	NULL	NULL	8.0	8.0	8.0	13.5	13.5	13.5	11.0	11.0	11.0	8.5	8.5	8.5	10.5	10.5	10.5	9.0	9.0	9.0	8.5	8.5	8.5	9.5	9.5	9.5	9.0	9.0	9.0	9.1	9.1	9.1	9.3	9.3	9.3	10.2	10.2	10.2	11.5	11.5	11.5	7.2	7.2	7.2	8.7	8.7
mimarks_environment	depth	meter	6	6	6	6	6	6	6	6	6	6	6	6	6	6	6	6	6	6	6	6	6	6	6	6	6	6	6	6	6	6	6	6	6	6	6	6	6	6	6	6	6	6	6	6	6	6	6
mimarks_environment	environment	Alphanumeric	ENVO:seawater;ENVO:marine_habitat;ENVO:water	ENVO:seawater;ENVO:marine_habitat;ENVO:water	ENVO:seawater;ENVO:marine_habitat;ENVO:water	ENVO:seawater;ENVO:marine_habitat;ENVO:water	ENVO:seawater;ENVO:marine_habitat;ENVO:water	ENVO:seawater;ENVO:marine_habitat;ENVO:water	ENVO:seawater;ENVO:marine_habitat;ENVO:water	ENVO:seawater;ENVO:marine_habitat;ENVO:water	ENVO:seawater;ENVO:marine_habitat;ENVO:water	ENVO:seawater;ENVO:marine_habitat;ENVO:water	ENVO:seawater;ENVO:marine_habitat;ENVO:water	ENVO:seawater;ENVO:marine_habitat;ENVO:water	ENVO:seawater;ENVO:marine_habitat;ENVO:water	ENVO:seawater;ENVO:marine_habitat;ENVO:water	ENVO:seawater;ENVO:marine_habitat;ENVO:water	ENVO:seawater;ENVO:marine_habitat;ENVO:water	ENVO:seawater;ENVO:marine_habitat;ENVO:water	ENVO:seawater;ENVO:marine_habitat;ENVO:water	ENVO:seawater;ENVO:marine_habitat;ENVO:water	ENVO:seawater;ENVO:marine_habitat;ENVO:water	ENVO:seawater;ENVO:marine_habitat;ENVO:water	ENVO:seawater;ENVO:marine_habitat;ENVO:water	ENVO:seawater;ENVO:marine_habitat;ENVO:water	ENVO:seawater;ENVO:marine_habitat;ENVO:water	ENVO:seawater;ENVO:marine_habitat;ENVO:water	ENVO:seawater;ENVO:marine_habitat;ENVO:water	ENVO:seawater;ENVO:marine_habitat;ENVO:water	ENVO:seawater;ENVO:marine_habitat;ENVO:water	ENVO:seawater;ENVO:marine_habitat;ENVO:water	ENVO:seawater;ENVO:marine_habitat;ENVO:water	ENVO:seawater;ENVO:marine_habitat;ENVO:water	ENVO:seawater;ENVO:marine_habitat;ENVO:water	ENVO:seawater;ENVO:marine_habitat;ENVO:water	ENVO:seawater;ENVO:marine_habitat;ENVO:water	ENVO:seawater;ENVO:marine_habitat;ENVO:water	ENVO:seawater;ENVO:marine_habitat;ENVO:water	ENVO:seawater;ENVO:marine_habitat;ENVO:water	ENVO:seawater;ENVO:marine_habitat;ENVO:water	ENVO:seawater;ENVO:marine_habitat;ENVO:water	ENVO:seawater;ENVO:marine_habitat;ENVO:water	ENVO:seawater;ENVO:marine_habitat;ENVO:water	ENVO:seawater;ENVO:marine_habitat;ENVO:water	ENVO:seawater;ENVO:marine_habitat;ENVO:water	ENVO:seawater;ENVO:marine_habitat;ENVO:water	ENVO:seawater;ENVO:marine_habitat;ENVO:water	ENVO:seawater;ENVO:marine_habitat;ENVO:water	ENVO:seawater;ENVO:marine_habitat;ENVO:water
mimarks_environment	envo_biome	Alphanumeric	seawater	seawater	seawater	seawater	seawater	seawater	seawater	seawater	seawater	seawater	seawater	seawater	seawater	seawater	seawater	seawater	seawater	seawater	seawater	seawater	seawater	seawater	seawater	seawater	seawater	seawater	seawater	seawater	seawater	seawater	seawater	seawater	seawater	seawater	seawater	seawater	seawater	seawater	seawater	seawater	seawater	seawater	seawater	seawater	seawater	seawater	seawater
mimarks_environment	envo_feature	Alphanumeric	marine_habitat	marine_habitat	marine_habitat	marine_habitat	marine_habitat	marine_habitat	marine_habitat	marine_habitat	marine_habitat	marine_habitat	marine_habitat	marine_habitat	marine_habitat	marine_habitat	marine_habitat	marine_habitat	marine_habitat	marine_habitat	marine_habitat	marine_habitat	marine_habitat	marine_habitat	marine_habitat	marine_habitat	marine_habitat	marine_habitat	marine_habitat	marine_habitat	marine_habitat	marine_habitat	marine_habitat	marine_habitat	marine_habitat	marine_habitat	marine_habitat	marine_habitat	marine_habitat	marine_habitat	marine_habitat	marine_habitat	marine_habitat	marine_habitat	marine_habitat	marine_habitat	marine_habitat	marine_habitat	marine_habitat
mimarks_environment	envo_material	Alphanumeric	water	water	water	water	water	water	water	water	water	water	water	water	water	water	water	water	water	water	water	water	water	water	water	water	water	water	water	water	water	water	water	water	water	water	water	water	water	water	water	water	water	water	water	water	water	water	water
mimarks_environment	lat_lon	decimalDegree	-64.77-64.05	-64.77-64.05	-64.77-64.05	-64.77-64.05	-64.77-64.05	-64.77-64.05	-64.77-64.05	-64.77-64.05	-64.77-64.05	-64.77-64.05	-64.77-64.05	-64.77-64.05	-64.77-64.05	-64.77-64.05	-64.77-64.05	-64.77-64.05	-64.77-64.05	-64.77-64.05	-64.77-64.05	-64.77-64.05	-64.77-64.05	-64.77-64.05	-64.77-64.05	-64.77-64.05	-64.77-64.05	-64.77-64.05	-64.77-64.05	-64.77-64.05	-64.77-64.05	-64.77-64.05	-64.77-64.05	-64.77-64.05	-64.77-64.05	-64.77-64.05	-64.77-64.05	-64.77-64.05	-64.77-64.05	-64.77-64.05	-64.77-64.05	-64.77-64.05	-64.77-64.05	-64.77-64.05	-64.77-64.05	-64.77-64.05	-64.77-64.05	-64.77-64.05	-64.77-64.05
mimarks_environment	longhurst_zone_code	Alphanumeric	Polar Antarctic Province	Polar Antarctic Province	Polar Antarctic Province	Polar Antarctic Province	Polar Antarctic Province	Polar Antarctic Province	Polar Antarctic Province	Polar Antarctic Province	Polar Antarctic Province	Polar Antarctic Province	Polar Antarctic Province	Polar Antarctic Province	Polar Antarctic Province	Polar Antarctic Province	Polar Antarctic Province	Polar Antarctic Province	Polar Antarctic Province	Polar Antarctic Province	Polar Antarctic Province	Polar Antarctic Province	Polar Antarctic Province	Polar Antarctic Province	Polar Antarctic Province	Polar Antarctic Province	Polar Antarctic Province	Polar Antarctic Province	Polar Antarctic Province	Polar Antarctic Province	Polar Antarctic Province	Polar Antarctic Province	Polar Antarctic Province	Polar Antarctic Province	Polar Antarctic Province	Polar Antarctic Province	Polar Antarctic Province	Polar Antarctic Province	Polar Antarctic Province	Polar Antarctic Province	Polar Antarctic Province	Polar Antarctic Province	Polar Antarctic Province	Polar Antarctic Province	Polar Antarctic Province	Polar Antarctic Province	Polar Antarctic Province	Polar Antarctic Province	Polar Antarctic Province
mimarks_environment	env_package	Alphanumeric	water	water	water	water	water	water	water	water	water	water	water	water	water	water	water	water	water	water	water	water	water	water	water	water	water	water	water	water	water	water	water	water	water	water	water	water	water	water	water	water	water	water	water	water	water	water	water
mimarks_extension	leucine	picoMolePerLiter	0.962035	0.937798	NULL	0.813296	0.474513	0.664641	0.907414	1.16756	1.09495	3.3824	4.43987	4.02857	4.38958	4.34077	4.51443	4.48853	4.03366	3.46078	3.84021	3.66743	3.64149	7.15965	5.44443	4.74025	11.4478	6.25652	10.2697	19.54	9.69	16.42	5.72	7.33	6.01	44.39	43.49	4.044	30.29	26.32	26.37	65.71	69.21	62.62	111.9	71.69	128.77	118.43	110.53
mimarks_extension	chlorophyll	microgramPerLiter	0.0318403	0.065253	0.0769726	0.00938334	0.0107947	0.0123204	0.157915	0.142352	0.174393	0.439232	0.471273	0.39346	0.118047	0.110723	0.122167	0.201307	0.201307	0.114339	0.257561	0.208585	0.242456	0.532104	0.40623	0.411952	0.760909	0.675086	0.697972	0.1234	0.1234	0.1234	0.0003	0.0003	0.0003	6.6207	6.6207	6.6207	21.6587	21.6587	21.6587	7.3829	7.3829	7.3829	10.2577	10.2577	4.1978	4.1978	4.1978
mimarks_extension	depth	meter	6	6	6	6	6	6	6	6	6	6	6	6	6	6	6	6	6	6	6	6	6	6	6	6	6	6	6	6	6	6	6	6	6	6	6	6	6	6	6	6	6	6	6	6	6	6	6
mimarks_extension	tot_depth_water_col	meter	7	7	7	7	7	7	7	7	7	7	7	7	7	7	7	7	7	7	7	7	7	7	7	7	7	7	7	7	7	7	7	7	7	7	7	7	7	7	7	7	7	7	7	7	7	7	7
mimarks_extension	nitrite_plus_nitrate	microMolePerLiter	NULL	NULL	NULL	29.483	29.44	29.619	NULL	NULL	NULL	26.135	26.098	27.183	25.388	26.104	24.797	25.369	27.825	27.868	27.738	28.774	27.353	NULL	24.169	22.661	19.279	22.132	23.407	23.477	23.934	22.908	NULL	NULL	NULL	NULL	13.21	13.164	NULL	3.434	1.9	NULL	NULL	NULL	10.409	10.132	5.541	6.353	5.851
mimarks_extension	part_org_carb	microMolePerLiter	0.02	0.02	0.01	0.01	0.01	0.02	0.02	0.04	0.02	0.03	0.03	0.03	0.01	0.01	0.01	0.05	0.02	0.03	0.05	0.05	NULL	0.08	0.06	NULL	0.07	0.09	0.09	0.14	0.14	0.12	0.04	0.05	0.04	0.6	0.42	0.45	0.85	0.85	0.88	0.44	0.4	0.42	0.55	0.58	0.67	0.26	0.25
mimarks_extension	part_org_nitro	microMolePerLiter	0	0.01	0.01	0	0	0.01	0.01	0.01	0.01	0.01	0.01	0.01	0	0.01	0.01	0.02	0.01	0.01	0.05	0.05	NULL	0.02	0.01	NULL	0.05	0.02	0.02	0.07	0.03	0.03	0.01	0.01	0.01	0.13	0.09	0.1	0.19	0.2	0.2	0.12	0.1	0.09	0.12	0.15	0.18	0.07	0.08
mimarks_extension	phosphate	microMolePerLiter	NULL	NULL	NULL	2.092	2.135	2.144	NULL	NULL	NULL	1.845	1.892	1.776	1.863	1.848	1.808	1.959	1.957	1.932	1.96	2.06	2.072	NULL	1.759	1.781	1.658	1.631	1.659	1.772	1.79	1.769	NULL	NULL	NULL	NULL	1.099	1.092	NULL	0.56	0.496	NULL	NULL	NULL	0.999	0.963	0.816	0.814	0.819
mimarks_extension	salinity	PSU	35.5	35.5	33	36.5	36.5	36.5	NULL	NULL	NULL	36.2	36.2	36.2	35.9	35.9	35.9	35	35	35	34.9	34.9	34.9	33.6	33.6	33.6	35.3	35.3	35.3	NA	NA	NA	NA	NA	NA	NA	NA	NA	NA	NA	NA	NA	NA	NA	NA	NA	NA	NA	NA
mimarks_extension	silicate	microMolePerLiter	NULL	NULL	NULL	65.282	61.538	62.837	NULL	NULL	NULL	63.556	64.451	64.075	63.875	64.154	59.676	66.62	62.949	64.552	66.026	56.879	61.118	NULL	64.935	64.595	60.951	60.885	59.31	62.26	60.975	60.315	NULL	NULL	NULL	NULL	64.091	59.664	NULL	54.477	54.216	NULL	NULL	NULL	48.768	48.42	48.399	46.387	47.918
mimarks_extension	temp	celsius	-0.8	-0.8	-1.05	-0.98	-0.98	-0.98	-0.85	-0.85	-0.85	-0.22	-0.22	-0.22	0.07	0.07	0.07	0.17	0.17	0.17	0.14	0.14	0.14	0.4	0.4	0.4	0.77	0.77	0.77	0.1	0.1	0.1	0.4	0.4	0.4	1.5	1.5	1.5	1.5	1.5	1.5	1.3	1.3	1.3	1.6	1.6	1.6	1.6	1.6
mimarks_extension	bacteria_count	X106perML	NULL	NULL	NULL	NULL	NULL	NULL	NULL	NULL	NULL	NULL	NULL	NULL	NULL	NULL	NULL	NULL	NULL	NULL	NULL	NULL	NULL	0.067625	0.067429	0.119	0.165429	0.160643	0.154929	0.255692	0.259846	0.303462	0.236929	0.236857	0.262923	0.783231	0.938538	0.896923	0.637077	0.623154	0.680714	0.541231	0.498385	0.452786	1.22662	1.266	1.01986	1.08008	1.05107
mimarks_extension	rel_to_oxygen	oxic (aerobic) or anoxic (anaerobic)	Oxic	Oxic	Oxic	Oxic	Oxic	Oxic	Oxic	Oxic	Oxic	Oxic	Oxic	NULL	NULL	Oxic	Oxic	Oxic	Oxic	Oxic	Oxic	Oxic	Oxic	Oxic	Oxic	Oxic	Oxic	Oxic	Oxic	Oxic	Oxic	Oxic	Oxic	Oxic	Oxic	Oxic	Oxic	Oxic	Oxic	Oxic	Oxic	Oxic	Oxic	Oxic	Oxic	Oxic	Oxic	Oxic	Oxic
mimarks_nucleic_acid_sequence_source	samp_collect_device	Alphanumeric	seawater intake	seawater intake	seawater intake	seawater intake	seawater intake	seawater intake	seawater intake	seawater intake	seawater intake	seawater intake	seawater intake	seawater intake	seawater intake	seawater intake	seawater intake	seawater intake	seawater intake	seawater intake	seawater intake	seawater intake	seawater intake	seawater intake	seawater intake	seawater intake	seawater intake	seawater intake	seawater intake	seawater intake	seawater intake	seawater intake	seawater intake	seawater intake	seawater intake	seawater intake	seawater intake	seawater intake	seawater intake	seawater intake	seawater intake	seawater intake	seawater intake	seawater intake	seawater intake	seawater intake	seawater intake	seawater intake	seawater intake
mimarks_nucleic_acid_sequence_source	samp_mat_process	Alphanumeric	filtered seawater, 0.2-micron to 3.0 micron fraction	filtered seawater, 0.2-micron to 3.0 micron fraction	filtered seawater, 0.2-micron to 3.0 micron fraction	filtered seawater, 0.2-micron to 3.0 micron fraction	filtered seawater, 0.2-micron to 3.0 micron fraction	filtered seawater, 0.2-micron to 3.0 micron fraction	filtered seawater, 0.2-micron to 3.0 micron fraction	filtered seawater, 0.2-micron to 3.0 micron fraction	filtered seawater, 0.2-micron to 3.0 micron fraction	filtered seawater, 0.2-micron to 3.0 micron fraction	filtered seawater, 0.2-micron to 3.0 micron fraction	filtered seawater, 0.2-micron to 3.0 micron fraction	filtered seawater, 0.2-micron to 3.0 micron fraction	filtered seawater, 0.2-micron to 3.0 micron fraction	filtered seawater, 0.2-micron to 3.0 micron fraction	filtered seawater, 0.2-micron to 3.0 micron fraction	filtered seawater, 0.2-micron to 3.0 micron fraction	filtered seawater, 0.2-micron to 3.0 micron fraction	filtered seawater, 0.2-micron to 3.0 micron fraction	filtered seawater, 0.2-micron to 3.0 micron fraction	filtered seawater, 0.2-micron to 3.0 micron fraction	filtered seawater, 0.2-micron to 3.0 micron fraction	filtered seawater, 0.2-micron to 3.0 micron fraction	filtered seawater, 0.2-micron to 3.0 micron fraction	filtered seawater, 0.2-micron to 3.0 micron fraction	filtered seawater, 0.2-micron to 3.0 micron fraction	filtered seawater, 0.2-micron to 3.0 micron fraction	filtered seawater, 0.2-micron to 3.0 micron fraction	filtered seawater, 0.2-micron to 3.0 micron fraction	filtered seawater, 0.2-micron to 3.0 micron fraction	filtered seawater, 0.2-micron to 3.0 micron fraction	filtered seawater, 0.2-micron to 3.0 micron fraction	filtered seawater, 0.2-micron to 3.0 micron fraction	filtered seawater, 0.2-micron to 3.0 micron fraction	filtered seawater, 0.2-micron to 3.0 micron fraction	filtered seawater, 0.2-micron to 3.0 micron fraction	filtered seawater, 0.2-micron to 3.0 micron fraction	filtered seawater, 0.2-micron to 3.0 micron fraction	filtered seawater, 0.2-micron to 3.0 micron fraction	filtered seawater, 0.2-micron to 3.0 micron fraction	filtered seawater, 0.2-micron to 3.0 micron fraction	filtered seawater, 0.2-micron to 3.0 micron fraction	filtered seawater, 0.2-micron to 3.0 micron fraction	filtered seawater, 0.2-micron to 3.0 micron fraction	filtered seawater, 0.2-micron to 3.0 micron fraction	filtered seawater, 0.2-micron to 3.0 micron fraction	filtered seawater, 0.2-micron to 3.0 micron fraction
mimarks_nucleic_acid_sequence_source	samp_size	liter	4.8	3.9	5.7	5	5.4	5.3	5.4	7.6	7.4	5.9	4.9	5.2	4.9	5.3	5.2	7	6.9	6.2	5.5	4.5	5.8	5.3	5.4	5	5.1	5.4	5.3	NULL	NULL	NULL	NULL	NULL	NULL	NULL	NULL	NULL	NULL	NULL	NULL	NULL	NULL	NULL	NULL	NULL	NULL	NULL	NULL
mimarks_sequencing	lib_reads_seqd	integer_count	181421	185743	167001	51210	497199	168352	166117	187501	548650	484449	333939	147055	244428	189251	221066	417853	229446	434840	122380	71117	190141	297145	250578	246376	176168	436613	99581	158883	242952	242467	257579	196503	197030	139578	303994	331320	300393	219897	224851	190369	187568	174234	89802	272964	404058	219690	237907
mimarks_sequencing	multiplex_ident_1	Alphanumeric	TCAGC	GTATC	CTAGC	GTATC	GCTAC	ACGCA	GAGAC	GACTC	CTAGC	CGCTC	CGCTC	GTATC	GCTAC	ACGCA	GAGAC	GACTC	CTAGC	CGCTC	TCAGC	GTATC	GCTAC	ACGCA	GAGAC	GACTC	CTAGC	CGCTC	TCAGC	GTATC	GCTAC	ACGCA	GAGAC	GACTC	CTAGC	CGCTC	TCAGC	GTATC	GCTAC	ACGCA	GAGAC	GACTC	CTAGC	CGCTC	GTATC	GCTAC	ACGCA	GAGAC	GACTC
mimarks_sequencing	additional_mid	Additional MID	GTAGTA	GTAGTA	GTAGTA	CTGGCC	CTGGCC	CTGGCC	CTGGCC	CTGGCC	CTGGCC	CTGGCC	CTTGTA	AACATC	AACATC	AACATC	AACATC	AACATC	AACATC	AACATC	AGATAG	AGATAG	AGATAG	AGATAG	AGATAG	AGATAG	AGATAG	AGATAG	GTGAGT	GTGAGT	GTGAGT	GTGAGT	GTGAGT	GTGAGT	GTGAGT	GTGAGT	CATCAT	CATCAT	CATCAT	CATCAT	CATCAT	CATCAT	CATCAT	CATCAT	GTCGAC	GTCGAC	GTCGAC	GTCGAC	GTCGAC
mimarks_sequencing	nucl_acid_amp	Alphanumeric	DOI: 10.1371/journal.pone.0066643	DOI: 10.1371/journal.pone.0066643	DOI: 10.1371/journal.pone.0066643	DOI: 10.1371/journal.pone.0066643	DOI: 10.1371/journal.pone.0066643	DOI: 10.1371/journal.pone.0066643	DOI: 10.1371/journal.pone.0066643	DOI: 10.1371/journal.pone.0066643	DOI: 10.1371/journal.pone.0066643	DOI: 10.1371/journal.pone.0066643	DOI: 10.1371/journal.pone.0066643	DOI: 10.1371/journal.pone.0066643	DOI: 10.1371/journal.pone.0066643	DOI: 10.1371/journal.pone.0066643	DOI: 10.1371/journal.pone.0066643	DOI: 10.1371/journal.pone.0066643	DOI: 10.1371/journal.pone.0066643	DOI: 10.1371/journal.pone.0066643	DOI: 10.1371/journal.pone.0066643	DOI: 10.1371/journal.pone.0066643	DOI: 10.1371/journal.pone.0066643	DOI: 10.1371/journal.pone.0066643	DOI: 10.1371/journal.pone.0066643	DOI: 10.1371/journal.pone.0066643	DOI: 10.1371/journal.pone.0066643	DOI: 10.1371/journal.pone.0066643	DOI: 10.1371/journal.pone.0066643	DOI: 10.1371/journal.pone.0066643	DOI: 10.1371/journal.pone.0066643	DOI: 10.1371/journal.pone.0066643	DOI: 10.1371/journal.pone.0066643	DOI: 10.1371/journal.pone.0066643	DOI: 10.1371/journal.pone.0066643	DOI: 10.1371/journal.pone.0066643	DOI: 10.1371/journal.pone.0066643	DOI: 10.1371/journal.pone.0066643	DOI: 10.1371/journal.pone.0066643	DOI: 10.1371/journal.pone.0066643	DOI: 10.1371/journal.pone.0066643	DOI: 10.1371/journal.pone.0066643	DOI: 10.1371/journal.pone.0066643	DOI: 10.1371/journal.pone.0066643	DOI: 10.1371/journal.pone.0066643	DOI: 10.1371/journal.pone.0066643	DOI: 10.1371/journal.pone.0066643	DOI: 10.1371/journal.pone.0066643	DOI: 10.1371/journal.pone.0066643
mimarks_sequencing	domain	Alphanumeric	Bacteria	Bacteria	Bacteria	Bacteria	Bacteria	Bacteria	Bacteria	Bacteria	Bacteria	Bacteria	Bacteria	Bacteria	Bacteria	Bacteria	Bacteria	Bacteria	Bacteria	Bacteria	Bacteria	Bacteria	Bacteria	Bacteria	Bacteria	Bacteria	Bacteria	Bacteria	Bacteria	Bacteria	Bacteria	Bacteria	Bacteria	Bacteria	Bacteria	Bacteria	Bacteria	Bacteria	Bacteria	Bacteria	Bacteria	Bacteria	Bacteria	Bacteria	Bacteria	Bacteria	Bacteria	Bacteria	Bacteria
mimarks_sequencing	pcr_primers	Alphanumeric	967F-AQ:CTAACCGANGAACCTYACC;967F-UC3:967F-UC3;967F-PP:CNACGCGAAGAACCTTANC;967F-UC12*:CAACGCGMARAACCTTACC;1046R:CGACRRCCATGCANCACCT	967F-AQ:CTAACCGANGAACCTYACC;967F-UC3:967F-UC3;967F-PP:CNACGCGAAGAACCTTANC;967F-UC12*:CAACGCGMARAACCTTACC;1046R:CGACRRCCATGCANCACCT	967F-AQ:CTAACCGANGAACCTYACC;967F-UC3:967F-UC3;967F-PP:CNACGCGAAGAACCTTANC;967F-UC12*:CAACGCGMARAACCTTACC;1046R:CGACRRCCATGCANCACCT	967F-AQ:CTAACCGANGAACCTYACC;967F-UC3:967F-UC3;967F-PP:CNACGCGAAGAACCTTANC;967F-UC12*:CAACGCGMARAACCTTACC;1046R:CGACRRCCATGCANCACCT	967F-AQ:CTAACCGANGAACCTYACC;967F-UC3:967F-UC3;967F-PP:CNACGCGAAGAACCTTANC;967F-UC12*:CAACGCGMARAACCTTACC;1046R:CGACRRCCATGCANCACCT	967F-AQ:CTAACCGANGAACCTYACC;967F-UC3:967F-UC3;967F-PP:CNACGCGAAGAACCTTANC;967F-UC12*:CAACGCGMARAACCTTACC;1046R:CGACRRCCATGCANCACCT	967F-AQ:CTAACCGANGAACCTYACC;967F-UC3:967F-UC3;967F-PP:CNACGCGAAGAACCTTANC;967F-UC12*:CAACGCGMARAACCTTACC;1046R:CGACRRCCATGCANCACCT	967F-AQ:CTAACCGANGAACCTYACC;967F-UC3:967F-UC3;967F-PP:CNACGCGAAGAACCTTANC;967F-UC12*:CAACGCGMARAACCTTACC;1046R:CGACRRCCATGCANCACCT	967F-AQ:CTAACCGANGAACCTYACC;967F-UC3:967F-UC3;967F-PP:CNACGCGAAGAACCTTANC;967F-UC12*:CAACGCGMARAACCTTACC;1046R:CGACRRCCATGCANCACCT	967F-AQ:CTAACCGANGAACCTYACC;967F-UC3:967F-UC3;967F-PP:CNACGCGAAGAACCTTANC;967F-UC12*:CAACGCGMARAACCTTACC;1046R:CGACRRCCATGCANCACCT	967F-AQ:CTAACCGANGAACCTYACC;967F-UC3:967F-UC3;967F-PP:CNACGCGAAGAACCTTANC;967F-UC12*:CAACGCGMARAACCTTACC;1046R:CGACRRCCATGCANCACCT	967F-AQ:CTAACCGANGAACCTYACC;967F-UC3:967F-UC3;967F-PP:CNACGCGAAGAACCTTANC;967F-UC12*:CAACGCGMARAACCTTACC;1046R:CGACRRCCATGCANCACCT	967F-AQ:CTAACCGANGAACCTYACC;967F-UC3:967F-UC3;967F-PP:CNACGCGAAGAACCTTANC;967F-UC12*:CAACGCGMARAACCTTACC;1046R:CGACRRCCATGCANCACCT	967F-AQ:CTAACCGANGAACCTYACC;967F-UC3:967F-UC3;967F-PP:CNACGCGAAGAACCTTANC;967F-UC12*:CAACGCGMARAACCTTACC;1046R:CGACRRCCATGCANCACCT	967F-AQ:CTAACCGANGAACCTYACC;967F-UC3:967F-UC3;967F-PP:CNACGCGAAGAACCTTANC;967F-UC12*:CAACGCGMARAACCTTACC;1046R:CGACRRCCATGCANCACCT	967F-AQ:CTAACCGANGAACCTYACC;967F-UC3:967F-UC3;967F-PP:CNACGCGAAGAACCTTANC;967F-UC12*:CAACGCGMARAACCTTACC;1046R:CGACRRCCATGCANCACCT	967F-AQ:CTAACCGANGAACCTYACC;967F-UC3:967F-UC3;967F-PP:CNACGCGAAGAACCTTANC;967F-UC12*:CAACGCGMARAACCTTACC;1046R:CGACRRCCATGCANCACCT	967F-AQ:CTAACCGANGAACCTYACC;967F-UC3:967F-UC3;967F-PP:CNACGCGAAGAACCTTANC;967F-UC12*:CAACGCGMARAACCTTACC;1046R:CGACRRCCATGCANCACCT	967F-AQ:CTAACCGANGAACCTYACC;967F-UC3:967F-UC3;967F-PP:CNACGCGAAGAACCTTANC;967F-UC12*:CAACGCGMARAACCTTACC;1046R:CGACRRCCATGCANCACCT	967F-AQ:CTAACCGANGAACCTYACC;967F-UC3:967F-UC3;967F-PP:CNACGCGAAGAACCTTANC;967F-UC12*:CAACGCGMARAACCTTACC;1046R:CGACRRCCATGCANCACCT	967F-AQ:CTAACCGANGAACCTYACC;967F-UC3:967F-UC3;967F-PP:CNACGCGAAGAACCTTANC;967F-UC12*:CAACGCGMARAACCTTACC;1046R:CGACRRCCATGCANCACCT	967F-AQ:CTAACCGANGAACCTYACC;967F-UC3:967F-UC3;967F-PP:CNACGCGAAGAACCTTANC;967F-UC12*:CAACGCGMARAACCTTACC;1046R:CGACRRCCATGCANCACCT	967F-AQ:CTAACCGANGAACCTYACC;967F-UC3:967F-UC3;967F-PP:CNACGCGAAGAACCTTANC;967F-UC12*:CAACGCGMARAACCTTACC;1046R:CGACRRCCATGCANCACCT	967F-AQ:CTAACCGANGAACCTYACC;967F-UC3:967F-UC3;967F-PP:CNACGCGAAGAACCTTANC;967F-UC12*:CAACGCGMARAACCTTACC;1046R:CGACRRCCATGCANCACCT	967F-AQ:CTAACCGANGAACCTYACC;967F-UC3:967F-UC3;967F-PP:CNACGCGAAGAACCTTANC;967F-UC12*:CAACGCGMARAACCTTACC;1046R:CGACRRCCATGCANCACCT	967F-AQ:CTAACCGANGAACCTYACC;967F-UC3:967F-UC3;967F-PP:CNACGCGAAGAACCTTANC;967F-UC12*:CAACGCGMARAACCTTACC;1046R:CGACRRCCATGCANCACCT	967F-AQ:CTAACCGANGAACCTYACC;967F-UC3:967F-UC3;967F-PP:CNACGCGAAGAACCTTANC;967F-UC12*:CAACGCGMARAACCTTACC;1046R:CGACRRCCATGCANCACCT	967F-AQ:CTAACCGANGAACCTYACC;967F-UC3:967F-UC3;967F-PP:CNACGCGAAGAACCTTANC;967F-UC12*:CAACGCGMARAACCTTACC;1046R:CGACRRCCATGCANCACCT	967F-AQ:CTAACCGANGAACCTYACC;967F-UC3:967F-UC3;967F-PP:CNACGCGAAGAACCTTANC;967F-UC12*:CAACGCGMARAACCTTACC;1046R:CGACRRCCATGCANCACCT	967F-AQ:CTAACCGANGAACCTYACC;967F-UC3:967F-UC3;967F-PP:CNACGCGAAGAACCTTANC;967F-UC12*:CAACGCGMARAACCTTACC;1046R:CGACRRCCATGCANCACCT	967F-AQ:CTAACCGANGAACCTYACC;967F-UC3:967F-UC3;967F-PP:CNACGCGAAGAACCTTANC;967F-UC12*:CAACGCGMARAACCTTACC;1046R:CGACRRCCATGCANCACCT	967F-AQ:CTAACCGANGAACCTYACC;967F-UC3:967F-UC3;967F-PP:CNACGCGAAGAACCTTANC;967F-UC12*:CAACGCGMARAACCTTACC;1046R:CGACRRCCATGCANCACCT	967F-AQ:CTAACCGANGAACCTYACC;967F-UC3:967F-UC3;967F-PP:CNACGCGAAGAACCTTANC;967F-UC12*:CAACGCGMARAACCTTACC;1046R:CGACRRCCATGCANCACCT	967F-AQ:CTAACCGANGAACCTYACC;967F-UC3:967F-UC3;967F-PP:CNACGCGAAGAACCTTANC;967F-UC12*:CAACGCGMARAACCTTACC;1046R:CGACRRCCATGCANCACCT	967F-AQ:CTAACCGANGAACCTYACC;967F-UC3:967F-UC3;967F-PP:CNACGCGAAGAACCTTANC;967F-UC12*:CAACGCGMARAACCTTACC;1046R:CGACRRCCATGCANCACCT	967F-AQ:CTAACCGANGAACCTYACC;967F-UC3:967F-UC3;967F-PP:CNACGCGAAGAACCTTANC;967F-UC12*:CAACGCGMARAACCTTACC;1046R:CGACRRCCATGCANCACCT	967F-AQ:CTAACCGANGAACCTYACC;967F-UC3:967F-UC3;967F-PP:CNACGCGAAGAACCTTANC;967F-UC12*:CAACGCGMARAACCTTACC;1046R:CGACRRCCATGCANCACCT	967F-AQ:CTAACCGANGAACCTYACC;967F-UC3:967F-UC3;967F-PP:CNACGCGAAGAACCTTANC;967F-UC12*:CAACGCGMARAACCTTACC;1046R:CGACRRCCATGCANCACCT	967F-AQ:CTAACCGANGAACCTYACC;967F-UC3:967F-UC3;967F-PP:CNACGCGAAGAACCTTANC;967F-UC12*:CAACGCGMARAACCTTACC;1046R:CGACRRCCATGCANCACCT	967F-AQ:CTAACCGANGAACCTYACC;967F-UC3:967F-UC3;967F-PP:CNACGCGAAGAACCTTANC;967F-UC12*:CAACGCGMARAACCTTACC;1046R:CGACRRCCATGCANCACCT	967F-AQ:CTAACCGANGAACCTYACC;967F-UC3:967F-UC3;967F-PP:CNACGCGAAGAACCTTANC;967F-UC12*:CAACGCGMARAACCTTACC;1046R:CGACRRCCATGCANCACCT	967F-AQ:CTAACCGANGAACCTYACC;967F-UC3:967F-UC3;967F-PP:CNACGCGAAGAACCTTANC;967F-UC12*:CAACGCGMARAACCTTACC;1046R:CGACRRCCATGCANCACCT	967F-AQ:CTAACCGANGAACCTYACC;967F-UC3:967F-UC3;967F-PP:CNACGCGAAGAACCTTANC;967F-UC12*:CAACGCGMARAACCTTACC;1046R:CGACRRCCATGCANCACCT	967F-AQ:CTAACCGANGAACCTYACC;967F-UC3:967F-UC3;967F-PP:CNACGCGAAGAACCTTANC;967F-UC12*:CAACGCGMARAACCTTACC;1046R:CGACRRCCATGCANCACCT	967F-AQ:CTAACCGANGAACCTYACC;967F-UC3:967F-UC3;967F-PP:CNACGCGAAGAACCTTANC;967F-UC12*:CAACGCGMARAACCTTACC;1046R:CGACRRCCATGCANCACCT	967F-AQ:CTAACCGANGAACCTYACC;967F-UC3:967F-UC3;967F-PP:CNACGCGAAGAACCTTANC;967F-UC12*:CAACGCGMARAACCTTACC;1046R:CGACRRCCATGCANCACCT	967F-AQ:CTAACCGANGAACCTYACC;967F-UC3:967F-UC3;967F-PP:CNACGCGAAGAACCTTANC;967F-UC12*:CAACGCGMARAACCTTACC;1046R:CGACRRCCATGCANCACCT
mimarks_sequencing	target_gene	Alphanumeric	16S rRNA	16S rRNA	16S rRNA	16S rRNA	16S rRNA	16S rRNA	16S rRNA	16S rRNA	16S rRNA	16S rRNA	16S rRNA	16S rRNA	16S rRNA	16S rRNA	16S rRNA	16S rRNA	16S rRNA	16S rRNA	16S rRNA	16S rRNA	16S rRNA	16S rRNA	16S rRNA	16S rRNA	16S rRNA	16S rRNA	16S rRNA	16S rRNA	16S rRNA	16S rRNA	16S rRNA	16S rRNA	16S rRNA	16S rRNA	16S rRNA	16S rRNA	16S rRNA	16S rRNA	16S rRNA	16S rRNA	16S rRNA	16S rRNA	16S rRNA	16S rRNA	16S rRNA	16S rRNA	16S rRNA
mimarks_sequencing	target_subfragment	Alphanumeric	V6	V6	V6	V6	V6	V6	V6	V6	V6	V6	V6	V6	V6	V6	V6	V6	V6	V6	V6	V6	V6	V6	V6	V6	V6	V6	V6	V6	V6	V6	V6	V6	V6	V6	V6	V6	V6	V6	V6	V6	V6	V6	V6	V6	V6	V6	V6
mimarks_sequencing	nucl_acid_ext	Alphanumeric	https://github.com/cmluria/Palmer-Station-Bacterial-Succession	https://github.com/cmluria/Palmer-Station-Bacterial-Succession	https://github.com/cmluria/Palmer-Station-Bacterial-Succession	https://github.com/cmluria/Palmer-Station-Bacterial-Succession	https://github.com/cmluria/Palmer-Station-Bacterial-Succession	https://github.com/cmluria/Palmer-Station-Bacterial-Succession	https://github.com/cmluria/Palmer-Station-Bacterial-Succession	https://github.com/cmluria/Palmer-Station-Bacterial-Succession	https://github.com/cmluria/Palmer-Station-Bacterial-Succession	https://github.com/cmluria/Palmer-Station-Bacterial-Succession	https://github.com/cmluria/Palmer-Station-Bacterial-Succession	https://github.com/cmluria/Palmer-Station-Bacterial-Succession	https://github.com/cmluria/Palmer-Station-Bacterial-Succession	https://github.com/cmluria/Palmer-Station-Bacterial-Succession	https://github.com/cmluria/Palmer-Station-Bacterial-Succession	https://github.com/cmluria/Palmer-Station-Bacterial-Succession	https://github.com/cmluria/Palmer-Station-Bacterial-Succession	https://github.com/cmluria/Palmer-Station-Bacterial-Succession	https://github.com/cmluria/Palmer-Station-Bacterial-Succession	https://github.com/cmluria/Palmer-Station-Bacterial-Succession	https://github.com/cmluria/Palmer-Station-Bacterial-Succession	https://github.com/cmluria/Palmer-Station-Bacterial-Succession	https://github.com/cmluria/Palmer-Station-Bacterial-Succession	https://github.com/cmluria/Palmer-Station-Bacterial-Succession	https://github.com/cmluria/Palmer-Station-Bacterial-Succession	https://github.com/cmluria/Palmer-Station-Bacterial-Succession	https://github.com/cmluria/Palmer-Station-Bacterial-Succession	https://github.com/cmluria/Palmer-Station-Bacterial-Succession	https://github.com/cmluria/Palmer-Station-Bacterial-Succession	https://github.com/cmluria/Palmer-Station-Bacterial-Succession	https://github.com/cmluria/Palmer-Station-Bacterial-Succession	https://github.com/cmluria/Palmer-Station-Bacterial-Succession	https://github.com/cmluria/Palmer-Station-Bacterial-Succession	https://github.com/cmluria/Palmer-Station-Bacterial-Succession	https://github.com/cmluria/Palmer-Station-Bacterial-Succession	https://github.com/cmluria/Palmer-Station-Bacterial-Succession	https://github.com/cmluria/Palmer-Station-Bacterial-Succession	https://github.com/cmluria/Palmer-Station-Bacterial-Succession	https://github.com/cmluria/Palmer-Station-Bacterial-Succession	https://github.com/cmluria/Palmer-Station-Bacterial-Succession	https://github.com/cmluria/Palmer-Station-Bacterial-Succession	https://github.com/cmluria/Palmer-Station-Bacterial-Succession	https://github.com/cmluria/Palmer-Station-Bacterial-Succession	https://github.com/cmluria/Palmer-Station-Bacterial-Succession	https://github.com/cmluria/Palmer-Station-Bacterial-Succession	https://github.com/cmluria/Palmer-Station-Bacterial-Succession	https://github.com/cmluria/Palmer-Station-Bacterial-Succession
mimarks_sequencing	pcr_cond_without_Illumina_adaptors	Alphanumeric	initial denaturation:94degC_3min;denaturation:94degC_30sec;annealing:60degC_45sec;elongation:72degC_1min;final elongation:72degC_10 min;25 cycles	initial denaturation:94degC_3min;denaturation:94degC_30sec;annealing:60degC_45sec;elongation:72degC_1min;final elongation:72degC_10 min;25 cycles	initial denaturation:94degC_3min;denaturation:94degC_30sec;annealing:60degC_45sec;elongation:72degC_1min;final elongation:72degC_10 min;25 cycles	initial denaturation:94degC_3min;denaturation:94degC_30sec;annealing:60degC_45sec;elongation:72degC_1min;final elongation:72degC_10 min;25 cycles	initial denaturation:94degC_3min;denaturation:94degC_30sec;annealing:60degC_45sec;elongation:72degC_1min;final elongation:72degC_10 min;25 cycles	initial denaturation:94degC_3min;denaturation:94degC_30sec;annealing:60degC_45sec;elongation:72degC_1min;final elongation:72degC_10 min;25 cycles	initial denaturation:94degC_3min;denaturation:94degC_30sec;annealing:60degC_45sec;elongation:72degC_1min;final elongation:72degC_10 min;25 cycles	initial denaturation:94degC_3min;denaturation:94degC_30sec;annealing:60degC_45sec;elongation:72degC_1min;final elongation:72degC_10 min;25 cycles	initial denaturation:94degC_3min;denaturation:94degC_30sec;annealing:60degC_45sec;elongation:72degC_1min;final elongation:72degC_10 min;25 cycles	initial denaturation:94degC_3min;denaturation:94degC_30sec;annealing:60degC_45sec;elongation:72degC_1min;final elongation:72degC_10 min;25 cycles	initial denaturation:94degC_3min;denaturation:94degC_30sec;annealing:60degC_45sec;elongation:72degC_1min;final elongation:72degC_10 min;25 cycles	initial denaturation:94degC_3min;denaturation:94degC_30sec;annealing:60degC_45sec;elongation:72degC_1min;final elongation:72degC_10 min;25 cycles	initial denaturation:94degC_3min;denaturation:94degC_30sec;annealing:60degC_45sec;elongation:72degC_1min;final elongation:72degC_10 min;25 cycles	initial denaturation:94degC_3min;denaturation:94degC_30sec;annealing:60degC_45sec;elongation:72degC_1min;final elongation:72degC_10 min;25 cycles	initial denaturation:94degC_3min;denaturation:94degC_30sec;annealing:60degC_45sec;elongation:72degC_1min;final elongation:72degC_10 min;25 cycles	initial denaturation:94degC_3min;denaturation:94degC_30sec;annealing:60degC_45sec;elongation:72degC_1min;final elongation:72degC_10 min;25 cycles	initial denaturation:94degC_3min;denaturation:94degC_30sec;annealing:60degC_45sec;elongation:72degC_1min;final elongation:72degC_10 min;25 cycles	initial denaturation:94degC_3min;denaturation:94degC_30sec;annealing:60degC_45sec;elongation:72degC_1min;final elongation:72degC_10 min;25 cycles	initial denaturation:94degC_3min;denaturation:94degC_30sec;annealing:60degC_45sec;elongation:72degC_1min;final elongation:72degC_10 min;25 cycles	initial denaturation:94degC_3min;denaturation:94degC_30sec;annealing:60degC_45sec;elongation:72degC_1min;final elongation:72degC_10 min;25 cycles	initial denaturation:94degC_3min;denaturation:94degC_30sec;annealing:60degC_45sec;elongation:72degC_1min;final elongation:72degC_10 min;25 cycles	initial denaturation:94degC_3min;denaturation:94degC_30sec;annealing:60degC_45sec;elongation:72degC_1min;final elongation:72degC_10 min;25 cycles	initial denaturation:94degC_3min;denaturation:94degC_30sec;annealing:60degC_45sec;elongation:72degC_1min;final elongation:72degC_10 min;25 cycles	initial denaturation:94degC_3min;denaturation:94degC_30sec;annealing:60degC_45sec;elongation:72degC_1min;final elongation:72degC_10 min;25 cycles	initial denaturation:94degC_3min;denaturation:94degC_30sec;annealing:60degC_45sec;elongation:72degC_1min;final elongation:72degC_10 min;25 cycles	initial denaturation:94degC_3min;denaturation:94degC_30sec;annealing:60degC_45sec;elongation:72degC_1min;final elongation:72degC_10 min;25 cycles	initial denaturation:94degC_3min;denaturation:94degC_30sec;annealing:60degC_45sec;elongation:72degC_1min;final elongation:72degC_10 min;25 cycles	initial denaturation:94degC_3min;denaturation:94degC_30sec;annealing:60degC_45sec;elongation:72degC_1min;final elongation:72degC_10 min;25 cycles	initial denaturation:94degC_3min;denaturation:94degC_30sec;annealing:60degC_45sec;elongation:72degC_1min;final elongation:72degC_10 min;25 cycles	initial denaturation:94degC_3min;denaturation:94degC_30sec;annealing:60degC_45sec;elongation:72degC_1min;final elongation:72degC_10 min;25 cycles	initial denaturation:94degC_3min;denaturation:94degC_30sec;annealing:60degC_45sec;elongation:72degC_1min;final elongation:72degC_10 min;25 cycles	initial denaturation:94degC_3min;denaturation:94degC_30sec;annealing:60degC_45sec;elongation:72degC_1min;final elongation:72degC_10 min;25 cycles	initial denaturation:94degC_3min;denaturation:94degC_30sec;annealing:60degC_45sec;elongation:72degC_1min;final elongation:72degC_10 min;25 cycles	initial denaturation:94degC_3min;denaturation:94degC_30sec;annealing:60degC_45sec;elongation:72degC_1min;final elongation:72degC_10 min;25 cycles	initial denaturation:94degC_3min;denaturation:94degC_30sec;annealing:60degC_45sec;elongation:72degC_1min;final elongation:72degC_10 min;25 cycles	initial denaturation:94degC_3min;denaturation:94degC_30sec;annealing:60degC_45sec;elongation:72degC_1min;final elongation:72degC_10 min;25 cycles	initial denaturation:94degC_3min;denaturation:94degC_30sec;annealing:60degC_45sec;elongation:72degC_1min;final elongation:72degC_10 min;25 cycles	initial denaturation:94degC_3min;denaturation:94degC_30sec;annealing:60degC_45sec;elongation:72degC_1min;final elongation:72degC_10 min;25 cycles	initial denaturation:94degC_3min;denaturation:94degC_30sec;annealing:60degC_45sec;elongation:72degC_1min;final elongation:72degC_10 min;25 cycles	initial denaturation:94degC_3min;denaturation:94degC_30sec;annealing:60degC_45sec;elongation:72degC_1min;final elongation:72degC_10 min;25 cycles	initial denaturation:94degC_3min;denaturation:94degC_30sec;annealing:60degC_45sec;elongation:72degC_1min;final elongation:72degC_10 min;25 cycles	initial denaturation:94degC_3min;denaturation:94degC_30sec;annealing:60degC_45sec;elongation:72degC_1min;final elongation:72degC_10 min;25 cycles	initial denaturation:94degC_3min;denaturation:94degC_30sec;annealing:60degC_45sec;elongation:72degC_1min;final elongation:72degC_10 min;25 cycles	initial denaturation:94degC_3min;denaturation:94degC_30sec;annealing:60degC_45sec;elongation:72degC_1min;final elongation:72degC_10 min;25 cycles	initial denaturation:94degC_3min;denaturation:94degC_30sec;annealing:60degC_45sec;elongation:72degC_1min;final elongation:72degC_10 min;25 cycles	initial denaturation:94degC_3min;denaturation:94degC_30sec;annealing:60degC_45sec;elongation:72degC_1min;final elongation:72degC_10 min;25 cycles	initial denaturation:94degC_3min;denaturation:94degC_30sec;annealing:60degC_45sec;elongation:72degC_1min;final elongation:72degC_10 min;25 cycles
mimarks_sequencing	additional_pcr_cond_with_illumina_adaptors	Alphanumeric	initial denaturation:94degC_3min;denaturation:94degC_30sec;annealing:60degC_45sec;elongation:72degC_1min;final elongation:72degC_10 min;5 cycles	initial denaturation:94degC_3min;denaturation:94degC_30sec;annealing:60degC_45sec;elongation:72degC_1min;final elongation:72degC_10 min;5 cycles	initial denaturation:94degC_3min;denaturation:94degC_30sec;annealing:60degC_45sec;elongation:72degC_1min;final elongation:72degC_10 min;5 cycles	initial denaturation:94degC_3min;denaturation:94degC_30sec;annealing:60degC_45sec;elongation:72degC_1min;final elongation:72degC_10 min;5 cycles	initial denaturation:94degC_3min;denaturation:94degC_30sec;annealing:60degC_45sec;elongation:72degC_1min;final elongation:72degC_10 min;5 cycles	initial denaturation:94degC_3min;denaturation:94degC_30sec;annealing:60degC_45sec;elongation:72degC_1min;final elongation:72degC_10 min;5 cycles	initial denaturation:94degC_3min;denaturation:94degC_30sec;annealing:60degC_45sec;elongation:72degC_1min;final elongation:72degC_10 min;5 cycles	initial denaturation:94degC_3min;denaturation:94degC_30sec;annealing:60degC_45sec;elongation:72degC_1min;final elongation:72degC_10 min;5 cycles	initial denaturation:94degC_3min;denaturation:94degC_30sec;annealing:60degC_45sec;elongation:72degC_1min;final elongation:72degC_10 min;5 cycles	initial denaturation:94degC_3min;denaturation:94degC_30sec;annealing:60degC_45sec;elongation:72degC_1min;final elongation:72degC_10 min;5 cycles	initial denaturation:94degC_3min;denaturation:94degC_30sec;annealing:60degC_45sec;elongation:72degC_1min;final elongation:72degC_10 min;5 cycles	initial denaturation:94degC_3min;denaturation:94degC_30sec;annealing:60degC_45sec;elongation:72degC_1min;final elongation:72degC_10 min;5 cycles	initial denaturation:94degC_3min;denaturation:94degC_30sec;annealing:60degC_45sec;elongation:72degC_1min;final elongation:72degC_10 min;5 cycles	initial denaturation:94degC_3min;denaturation:94degC_30sec;annealing:60degC_45sec;elongation:72degC_1min;final elongation:72degC_10 min;5 cycles	initial denaturation:94degC_3min;denaturation:94degC_30sec;annealing:60degC_45sec;elongation:72degC_1min;final elongation:72degC_10 min;5 cycles	initial denaturation:94degC_3min;denaturation:94degC_30sec;annealing:60degC_45sec;elongation:72degC_1min;final elongation:72degC_10 min;5 cycles	initial denaturation:94degC_3min;denaturation:94degC_30sec;annealing:60degC_45sec;elongation:72degC_1min;final elongation:72degC_10 min;5 cycles	initial denaturation:94degC_3min;denaturation:94degC_30sec;annealing:60degC_45sec;elongation:72degC_1min;final elongation:72degC_10 min;5 cycles	initial denaturation:94degC_3min;denaturation:94degC_30sec;annealing:60degC_45sec;elongation:72degC_1min;final elongation:72degC_10 min;5 cycles	initial denaturation:94degC_3min;denaturation:94degC_30sec;annealing:60degC_45sec;elongation:72degC_1min;final elongation:72degC_10 min;5 cycles	initial denaturation:94degC_3min;denaturation:94degC_30sec;annealing:60degC_45sec;elongation:72degC_1min;final elongation:72degC_10 min;5 cycles	initial denaturation:94degC_3min;denaturation:94degC_30sec;annealing:60degC_45sec;elongation:72degC_1min;final elongation:72degC_10 min;5 cycles	initial denaturation:94degC_3min;denaturation:94degC_30sec;annealing:60degC_45sec;elongation:72degC_1min;final elongation:72degC_10 min;5 cycles	initial denaturation:94degC_3min;denaturation:94degC_30sec;annealing:60degC_45sec;elongation:72degC_1min;final elongation:72degC_10 min;5 cycles	initial denaturation:94degC_3min;denaturation:94degC_30sec;annealing:60degC_45sec;elongation:72degC_1min;final elongation:72degC_10 min;5 cycles	initial denaturation:94degC_3min;denaturation:94degC_30sec;annealing:60degC_45sec;elongation:72degC_1min;final elongation:72degC_10 min;5 cycles	initial denaturation:94degC_3min;denaturation:94degC_30sec;annealing:60degC_45sec;elongation:72degC_1min;final elongation:72degC_10 min;5 cycles	initial denaturation:94degC_3min;denaturation:94degC_30sec;annealing:60degC_45sec;elongation:72degC_1min;final elongation:72degC_10 min;5 cycles	initial denaturation:94degC_3min;denaturation:94degC_30sec;annealing:60degC_45sec;elongation:72degC_1min;final elongation:72degC_10 min;5 cycles	initial denaturation:94degC_3min;denaturation:94degC_30sec;annealing:60degC_45sec;elongation:72degC_1min;final elongation:72degC_10 min;5 cycles	initial denaturation:94degC_3min;denaturation:94degC_30sec;annealing:60degC_45sec;elongation:72degC_1min;final elongation:72degC_10 min;5 cycles	initial denaturation:94degC_3min;denaturation:94degC_30sec;annealing:60degC_45sec;elongation:72degC_1min;final elongation:72degC_10 min;5 cycles	initial denaturation:94degC_3min;denaturation:94degC_30sec;annealing:60degC_45sec;elongation:72degC_1min;final elongation:72degC_10 min;5 cycles	initial denaturation:94degC_3min;denaturation:94degC_30sec;annealing:60degC_45sec;elongation:72degC_1min;final elongation:72degC_10 min;5 cycles	initial denaturation:94degC_3min;denaturation:94degC_30sec;annealing:60degC_45sec;elongation:72degC_1min;final elongation:72degC_10 min;5 cycles	initial denaturation:94degC_3min;denaturation:94degC_30sec;annealing:60degC_45sec;elongation:72degC_1min;final elongation:72degC_10 min;5 cycles	initial denaturation:94degC_3min;denaturation:94degC_30sec;annealing:60degC_45sec;elongation:72degC_1min;final elongation:72degC_10 min;5 cycles	initial denaturation:94degC_3min;denaturation:94degC_30sec;annealing:60degC_45sec;elongation:72degC_1min;final elongation:72degC_10 min;5 cycles	initial denaturation:94degC_3min;denaturation:94degC_30sec;annealing:60degC_45sec;elongation:72degC_1min;final elongation:72degC_10 min;5 cycles	initial denaturation:94degC_3min;denaturation:94degC_30sec;annealing:60degC_45sec;elongation:72degC_1min;final elongation:72degC_10 min;5 cycles	initial denaturation:94degC_3min;denaturation:94degC_30sec;annealing:60degC_45sec;elongation:72degC_1min;final elongation:72degC_10 min;5 cycles	initial denaturation:94degC_3min;denaturation:94degC_30sec;annealing:60degC_45sec;elongation:72degC_1min;final elongation:72degC_10 min;5 cycles	initial denaturation:94degC_3min;denaturation:94degC_30sec;annealing:60degC_45sec;elongation:72degC_1min;final elongation:72degC_10 min;5 cycles	initial denaturation:94degC_3min;denaturation:94degC_30sec;annealing:60degC_45sec;elongation:72degC_1min;final elongation:72degC_10 min;5 cycles	initial denaturation:94degC_3min;denaturation:94degC_30sec;annealing:60degC_45sec;elongation:72degC_1min;final elongation:72degC_10 min;5 cycles	initial denaturation:94degC_3min;denaturation:94degC_30sec;annealing:60degC_45sec;elongation:72degC_1min;final elongation:72degC_10 min;5 cycles	initial denaturation:94degC_3min;denaturation:94degC_30sec;annealing:60degC_45sec;elongation:72degC_1min;final elongation:72degC_10 min;5 cycles
mimarks_sequencing	sequencing_meth	Alphanumeric	Illumina HiSeq 1000 cycle paired-end	Illumina HiSeq 1000 cycle paired-end	Illumina HiSeq 1000 cycle paired-end	Illumina HiSeq 1000 cycle paired-end	Illumina HiSeq 1000 cycle paired-end	Illumina HiSeq 1000 cycle paired-end	Illumina HiSeq 1000 cycle paired-end	Illumina HiSeq 1000 cycle paired-end	Illumina HiSeq 1000 cycle paired-end	Illumina HiSeq 1000 cycle paired-end	Illumina HiSeq 1000 cycle paired-end	Illumina HiSeq 1000 cycle paired-end	Illumina HiSeq 1000 cycle paired-end	Illumina HiSeq 1000 cycle paired-end	Illumina HiSeq 1000 cycle paired-end	Illumina HiSeq 1000 cycle paired-end	Illumina HiSeq 1000 cycle paired-end	Illumina HiSeq 1000 cycle paired-end	Illumina HiSeq 1000 cycle paired-end	Illumina HiSeq 1000 cycle paired-end	Illumina HiSeq 1000 cycle paired-end	Illumina HiSeq 1000 cycle paired-end	Illumina HiSeq 1000 cycle paired-end	Illumina HiSeq 1000 cycle paired-end	Illumina HiSeq 1000 cycle paired-end	Illumina HiSeq 1000 cycle paired-end	Illumina HiSeq 1000 cycle paired-end	Illumina HiSeq 1000 cycle paired-end	Illumina HiSeq 1000 cycle paired-end	Illumina HiSeq 1000 cycle paired-end	Illumina HiSeq 1000 cycle paired-end	Illumina HiSeq 1000 cycle paired-end	Illumina HiSeq 1000 cycle paired-end	Illumina HiSeq 1000 cycle paired-end	Illumina HiSeq 1000 cycle paired-end	Illumina HiSeq 1000 cycle paired-end	Illumina HiSeq 1000 cycle paired-end	Illumina HiSeq 1000 cycle paired-end	Illumina HiSeq 1000 cycle paired-end	Illumina HiSeq 1000 cycle paired-end	Illumina HiSeq 1000 cycle paired-end	Illumina HiSeq 1000 cycle paired-end	Illumina HiSeq 1000 cycle paired-end	Illumina HiSeq 1000 cycle paired-end	Illumina HiSeq 1000 cycle paired-end	Illumina HiSeq 1000 cycle paired-end	Illumina HiSeq 1000 cycle paired-end
[truncated: 21 more columns]
